# Supplementary material for: The use of a portable metabolic monitoring device for measuring RMR in healthy adults
Source: Br J Nutr. 2020 Mar 16;124(11):1229–40. doi: 10.1017/S0007114520001014 (PMC7653515; doi:10.1017/S0007114520001014)
Supplement: Supplementary file 1 [file S0007114520001014sup001.doc]

**Supplementary Figure 1**: Bland-Altman plots of difference in (a) resting metabolic rate (RMR) versus average RMR; (b) oxygen consumption (VO2) versus average VO2.

The solid line represents the expected difference in (a) RMR and (b) VO2 measured by QUARK RMR and Fitmate GS, while the dashed lines represent the regression-based upper and lower 95% limits of agreement (expected difference derived from the line of best agreement ± 1.96 * residual SD from the regression). Grey dots represent males and black dots represent females.


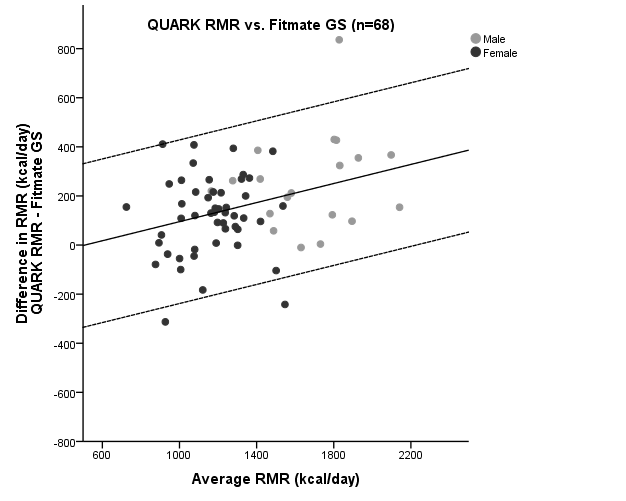
a.


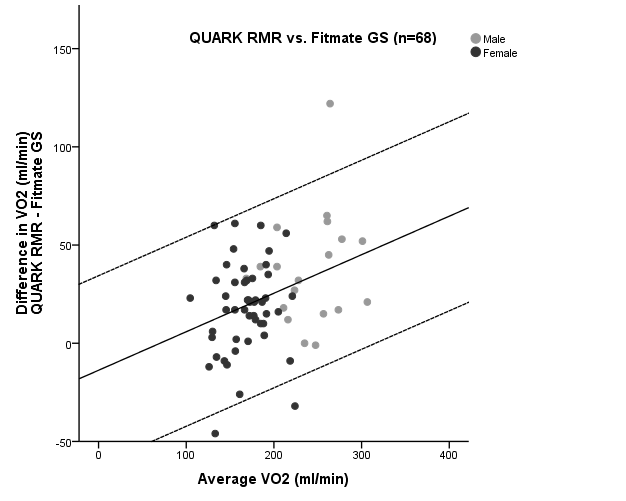
b.
